# Supplementary material
Source: HighWire-hosted journal article supplement (https://thorax.bmj.com/content/thoraxjnl-2021-217663)
Supplement: inline-supplementary-material-2 [file inline-supplementary-material-2.pdf]

**Appendix 2: JBI Risk of Bias Critical Appraisal Assessment Tool**

|                         | Was sample frame appropriate to address the target population? | Were study participants sampled in an appropriate way? | Was the sample size adequate? | Were the study subjects and the setting described in detail? | Was the data analysis conducted with sufficient coverage of the identified sample? | Were valid methods used for identification of the condition? | Was the condition measured in a standard, reliable way for all participants? | Was there appropriate statistical analysis? | Was the response rate adequate, and if not, was the low response rate managed appropriately? | Overall appraisal                                            |
|-------------------------|----------------------------------------------------------------|--------------------------------------------------------|-------------------------------|--------------------------------------------------------------|------------------------------------------------------------------------------------|--------------------------------------------------------------|------------------------------------------------------------------------------|---------------------------------------------|----------------------------------------------------------------------------------------------|--------------------------------------------------------------|
| Affolabi et al. 2011*   | Yes                                                            | Yes                                                    | Yes                           | No                                                           | Yes                                                                                | Yes                                                          | Yes                                                                          | Yes                                         | Yes                                                                                          | INCLUDE                                                      |
| Boehme et al. 2011      | Yes                                                            | No                                                     | No                            | Yes                                                          | Yes                                                                                | Yes                                                          | Yes                                                                          | Yes                                         | Yes                                                                                          | Uganda borderline sample size<br>Sampled set days<br>INCLUDE |
| Bruchfeld et al. 2002   | Yes                                                            | No                                                     | Yes                           | Yes                                                          | Yes                                                                                | Yes                                                          | Yes                                                                          | Yes                                         | Yes                                                                                          | Convenience sampling<br>Sampled set days<br>INCLUDE          |
| Cuevas et al. 2011      | Yes                                                            | Yes                                                    | Yes                           | Yes                                                          | Yes                                                                                | Yes                                                          | Yes                                                                          | Yes                                         | Yes                                                                                          | INCLUDE                                                      |
| Deribew et al. 2012     | Yes                                                            | Yes                                                    | Yes                           | Yes                                                          | Yes                                                                                | Yes                                                          | Yes                                                                          | Yes                                         | Yes                                                                                          | 11% not included<br>INCLUDE                                  |
| Dorman et al. 2018      | Yes                                                            | Yes                                                    | No                            | Yes                                                          | Yes                                                                                | Yes                                                          | Yes                                                                          | Yes                                         | Yes                                                                                          | INCLUDE                                                      |
| Hamusse et al. 2017     | Yes                                                            | Yes                                                    | Yes                           | Yes                                                          | Yes                                                                                | Yes                                                          | Yes                                                                          | Yes                                         | Yes                                                                                          | INCLUDE                                                      |
| Hanrahan et al. 2014    | Yes                                                            | Yes                                                    | Yes                           | Yes                                                          | Yes                                                                                | Yes                                                          | Yes                                                                          | Yes                                         | Yes                                                                                          | INCLUDE                                                      |
| Huerga et al. 2012*     | Yes                                                            | Yes                                                    | Yes                           | Yes                                                          | Yes                                                                                | Yes                                                          | Yes                                                                          | Yes                                         | Yes                                                                                          | INCLUDE                                                      |
| Jayasooriya et al. 2019 | Yes                                                            | Yes                                                    | No                            | Yes                                                          | Yes                                                                                | Yes                                                          | Yes                                                                          | Yes                                         | Yes                                                                                          | INCLUDE                                                      |
| Lawson et al. 2008      | Yes                                                            | Yes                                                    | Yes                           | Yes                                                          | Yes                                                                                | Yes                                                          | Yes                                                                          | Yes                                         | Yes                                                                                          | 11% not included                                             |

|                     |     |         |     |     |     |     |     |     |         |                                                    |
|---------------------|-----|---------|-----|-----|-----|-----|-----|-----|---------|----------------------------------------------------|
|                     |     |         |     |     |     |     |     |     |         | INCLUDE                                            |
| Ling et al. 2011    | Yes | Yes     | Yes | Yes | No  | Yes | Yes | Yes | Yes     | Sampled over 3years<br>21% not included<br>INCLUDE |
| Merid et al. 2019   | Yes | Yes     | Yes | Yes | Yes | Yes | Yes | Yes | Yes     | INCLUDE                                            |
| Munyati et al. 2005 | Yes | No      | Yes     | Convenience sampling<br>INCLUDE                    |
| Nliwasa et al. 2016 | Yes | No      | Yes     | Borderline sample size<br>INCLUDE                  |
| Reither et al.      | Yes | Unclear | No  | No  | Yes | Yes | Yes | Yes | Yes     | Limited setting detail<br>INCLUDE                  |
| Sekandi et al. 2014 | Yes | No      | Yes     | Small sample size<br>INCLUDE                       |
| Theron et al. 2011  | No  | Unclear | Yes | Yes | Yes | Yes | Yes | Yes | Unclear | Sampled over 3years<br>INCLUDE                     |

\*Smear negative studies
